# Supplementary material
Source: PubMed Central journal article supplement (PMC3674030)
Supplement: NIHMS404387-supplement-01.pdf [file NIHMS404387-supplement-01.pdf]

## **Young Adults at Risk for Stimulant Dependence Show Reward Dysfunction during Reinforcement-Based Decision Making**

### *Supplemental Information*

#### **Supplemental Methods**

##### **Tables S1-S3: Group Results**

Please refer to the Methods section of the main text. Tables S1-S3 report functional magnetic resonance imaging (fMRI) linear mixed effects (LME) group differences for early versus late trials.

##### **Tables S4-S5: Robust Regressions for Substance Use**

Since it was not theoretically appropriate to include lifetime stimulant and cannabis use as well as current alcohol and nicotine use as covariates in the main LME group analysis given that that occasional stimulant users (OSU) and control (CTL) groups differed significantly on these variables (1), two robust regressions (2, 3) were performed in R within OSU only ( $n = 161$ ) to examine whether a priori regions (striatum, inferior frontal gyrus (IFG), insula) were associated with these measures. Each regression was subject to a bootstrapping procedure in R in order to obtain confidence limits, estimated bias coefficients, and  $t$  statistics (random sampling with replacement;  $n = 25$  bootstraps,  $n = 50$  maximum iterations, confidence intervals set at 95%) for each regressor. Given that LME group by decision findings revealed important group differences during late trials, the dependent variable was percent signal change during late trials. Analogous whole brain and limbic mask Alpha Sim values used for the group by decision time LME interaction were applied. The first regression examined unique variance associated with three predictors indexing lifetime use: 1) prescription stimulants, 2) cocaine, and 3) cannabis. The second regression examined unique variance associated with two predictors of current use: 1) number of cigarettes per day, and 2) number of alcohol drinks per week. All variables except weekly alcohol use

were natural log transformed + 1 due to non-normal distributions, and all variables were z-scored prior to regression entry.

### **Table S6: Early and Late Trials Separately**

Two *t*-tests were performed in AFNI to compare OSU and CTL for early trials and late trials in the decision phase separately in order to examine differences in the processing of uncertainty (trial-and-error learning of action-outcome contingencies) apart from certainty (execution of learned contingencies). A threshold adjustment method based on Monte-Carlo simulations (AFNI's program Alpha Sim) was applied to guard against identifying false positive areas of activation (considering the whole brain voxel size and 4 mm smoothness). Alpha Sim identified a minimum cluster volume of 768  $\mu\text{L}$  with a cluster significance of  $p < .05$  corrected for multiple comparisons (voxel-wise probability:  $p < .05$ ). Limbic masks were also applied to examine a priori hypotheses involving insula and dorsal striatum using a minimum cluster volume of 320 and 250  $\mu\text{L}$ , respectively. For significant clusters, average percent signal change from baseline was extracted.

### **Table S7: Decisions during Preferred Response Selection**

An exploratory analysis was performed for the decision phase in order to examine whether, regardless of early or late learning phase during decision making, OSU and CTL exhibited differential brain activation to trials in which they selected the preferred response. Each subject's behavioral performance determined three new regressors of interest: trials in which the subject selected 1) the preferred response, 2) the tied response, and 3) the worst response. A new deconvolution was performed, wherein three movement regressors (roll, pitch, and yaw), a baseline and linear drift regressor, and three behavioral regressors (preferred selection, even selection, worst selection), were convolved with a modified hemodynamic response function. The remaining fMRI preprocessing steps were analogous to those reported in the main text.

Group (OSU, CTL) and response type (preferred trials, even trials, worst trials) were subjected to a LME analysis across all voxels. Subjects were treated as random effects, whereas group and response type were modeled as fixed effects. The group by response type interaction effect was of interest to examine group differences in the response to rewarding trials. A threshold adjustment method based on Monte-Carlo simulations (AFNI's program Alpha Sim) was applied to guard against identifying false positive areas of activation (considering the whole brain voxel size and 4 mm smoothness). For the group by response type interaction, Alpha Sim identified a minimum cluster volume of 768  $\mu\text{L}$  with a cluster significance of  $p < .05$  corrected for multiple comparisons (voxel-wise probability:  $p < .05$ ). Limbic masks were also applied to examine a priori hypotheses involving insula and dorsal striatum using a minimum cluster volume of 320 and 250  $\mu\text{L}$ , respectively. For significant clusters, average percent signal change from baseline was extracted.

#### **Table S8: Responses to Winning Outcomes**

An exploratory analysis was performed in order to examine differential brain activation for OSU and CTL in response to wins during the outcome phase of the task only (wins, ties and losses). A separate deconvolution analysis pathway was conducted that focused on the outcome portion of each trial when win, tie, or loss feedback was presented to the subject, wherein three movement regressors (roll, pitch, and yaw), a baseline and linear drift regressor, and three behavioral regressors (wins, ties, losses), were convolved with a modified hemodynamic response function. The remaining fMRI preprocessing steps were analogous to those reported in the main text.

Group (OSU, CTL) and outcome (wins, ties, losses) were subjected to a LME analysis across all voxels. Subjects were treated as random effects, whereas group and outcome were modeled as fixed effects. The group by outcome interaction effect was of interest to examine group differences in the response to winning feedback. A threshold adjustment method based on Monte-Carlo simulations (AFNI's program Alpha Sim) was applied to guard against identifying false positive areas of activation

(considering the whole brain voxel size and 4 mm smoothness). For the group by outcome interaction, Alpha Sim identified a minimum cluster volume of 768  $\mu\text{L}$  with a cluster significance of  $p < .05$  corrected for multiple comparisons (voxel-wise probability:  $p < .05$ ). Limbic masks were also applied to examine a priori hypotheses involving insula and dorsal striatum using a minimum cluster volume of 320 and 250  $\mu\text{L}$ , respectively. For significant clusters, average percent signal change from baseline was extracted.

## **Supplemental Results**

### **Tables S1-S3: Group Results**

Please refer to the Results section of the main text.

### **Tables S4-S5: Robust Regressions for Substance Use**

Results indicated that higher lifetime prescription stimulant use and current alcohol use were associated with lower dorsal striatum activation, whereas higher lifetime cannabis use was linked to greater dorsal striatum activation. In addition, higher current nicotine use was linked to lower insula and IFG activation (see Tables S4 and S5).

### **Table S6: Early and Late Trials Separately**

During early trials, CTL exhibited greater medial frontal gyrus and left striatum activation than OSU when action-outcome contingencies were being established. In contrast, during late trials, OSU displayed greater anterior and posterior insula activation than CTL during the execution of learned contingencies. In addition, for early and late trials, OSU showed greater left middle frontal gyrus activation than CTL.

### **Table S7: Decisions during Preferred Response Selection**

Results based on individual subjects' selection of the preferred, even and worst responses indicated that CTL exhibited greater dorsal striatum, IFG, anterior insula, and medial frontal gyrus activation than OSU during decision making for trials in which the preferred response was selected. OSU and CTL did not differ in activation for these regions during selection of the tied or worst response.

### **Table S8: Responses to Winning Outcomes**

Findings for the outcome phase of the task showed that CTL displayed greater cuneus and hypothalamus activation than OSU during wins and ties. In contrast, OSU showed higher medial frontal gyrus activation than CTL for wins.

## **Supplemental Discussion**

### **Tables S4-S5: Robust Regressions for Substance Use**

Findings of the present study demonstrated that whereas higher lifetime cannabis use was associated with greater dorsal striatum activation during late trials, results consistent with a recent study showing that chronic cannabis users exhibited greater dorsal stratum across decision making trials during a gambling task involving reward (4). In contrast, higher lifetime prescription stimulant use and current alcohol use were linked to less dorsal striatum during the execution of learned contingencies, suggesting that use of these substances was not driving LME group differences in striatal activation in late trials. In addition, higher current nicotine use was associated with less anterior and posterior insula activation but not greater dorsal striatum activation during late trials when contingencies were being implemented, indicating that nicotine use did not appear to account for heightened insula and striatum activation during late trials.

### **Table S6: Early and Late Trials Separately**

Group differences in early and late trials were analyzed separately in order to examine decision making processes during uncertainty (during trial-and-error learning in early trials) and certainty (in late trials when contingencies were known). In early trials when action-outcome contingencies were ambiguous, CTL exhibited greater medial frontal cortex and dorsal striatum activation than OSU during early trials. Research has shown that in healthy individuals, heightened dorsomedial prefrontal cortex and dorsal striatum activations are linked to reward prediction error as well as successful decision making in the face of uncertainty (5). The fact that OSU are under-recruiting dorsal striatum and medial frontal gyrus, regions shown to assist in initial reward learning may explain why, in late trials, these individuals are over-recruiting anterior and posterior insula during decision making, given that insula is associated with interoceptive feeling states that help to aid “gut responses” during decision making (6). Across early and late trials, OSU showed greater left middle frontal gyrus activation than CTL, suggesting that OSU need to recruit additional resources than CTL to maintain task goals and/or response sets in working memory, given prior literature the role of left middle frontal gyrus on working memory in healthy individuals (7, 8).

### **Table S7: Decisions during Preferred Response Selection**

Results demonstrated that when CTL selected the preferred response across trials, they exhibited greater activation than OSU in dorsal striatum, anterior insula, IFG, and medial frontal cortex, findings suggesting that OSU recruits less neural resources to process reward and risk during rewarding action-outcome contingencies. Research indicates that dorsal striatum plays an important role in linking reward to optimal behavior (9) and medial frontal cortex activation during reinforcement reflects reward prediction error, or the difference between predicted and experienced reward (5). IFG is also involved in the implementation of reward prediction error as well as risk prediction error, or the difference between predicted and realized risk of a decision, the latter also implemented by the insula (5, 10). Risk prediction

error is computed when probabilities are initially unknown and the expected value of a decision needs to be learned through experience, and insula activation is thought to represent the affective experience associated with risk processing (11). Given that OSU appear to use less resources to process reward and risk during decision making in the present study, these findings may extend to everyday life situations in which positive and negative consequences of potential choices may not be fully evaluated. Promising treatments are currently being evaluated to modify substance users' neural and behavioral responses during decision making, however. For example, a recent study in methamphetamine dependent individuals demonstrated that drug treatment for stimulant addiction may improve recruitment of cognitive resources (e.g., normalized dorsal striatum, IFG and insula activation for modafinil compared to placebo) for these individuals during reward-related decision making (12).

### **Table S8: Responses to Winning Outcomes**

OSU and CTL groups did not differ in brain activation in regions involved in reward responsivity (e.g., ventral striatum) during the outcome phase in response to wins, ties, or losses. These findings suggest that reduced neural responsivity to rewards may be a consequence of chronic or frequent drug use as opposed to occasional stimulant use.

### **Summary and Conclusions**

Overall, results presented in the main text and findings from exploratory analyses presented here support the assertion that OSU exhibit altered brain activation during reinforcement learning in regions involved in reward and risk evaluation. First, OSU recruit excessive neural resources in dorsal striatum, IFG, and insula while making decisions wherein reward contingencies have already been learned and should not require that additional effort. Findings within late trials separately also support the over-recruitment of anterior insula by OSU to execute contingencies. Second, OSU exhibit under-recruitment of dorsal striatum, IFG and insula during decision making on trials in which the preferred behavioral

response was selected, suggesting reduced neural processing of optimal action-outcome contingencies. Finally, outcome analyses do not show these differences between OSU and CTL, suggesting that altered processing of reward outcomes may be a consequence of more chronic stimulant use rather than occasional use. Future longitudinal studies are warranted to examine whether brain activation during occasional use predicts the transition to chronic stimulus use.



**Table S1.** fMRI Results for the Group (OSU, CTL) by Decision Time (Early Trials, Late Trials) Interaction ( $n = 209$ ).

| Volume ( $\mu$ L) | x   | y   | z   | L/R | Area                                   | Early Trials | Late Trials |
|-------------------|-----|-----|-----|-----|----------------------------------------|--------------|-------------|
| 8960 <sup>1</sup> | -25 | -49 | 42  | L   | Precuneus                              | CTL > OSU    | OSU > CTL   |
| 8128 <sup>1</sup> | -49 | -47 | 8   | L   | Middle Temporal Gyrus                  | CTL > OSU    | OSU > CTL   |
| 4352 <sup>1</sup> | -37 | 18  | 9   | L   | Anterior Insula/Inferior Frontal Gyrus | ns           | OSU > CTL   |
| 4032 <sup>1</sup> | 44  | 16  | 17  | R   | Inferior Frontal Gyrus                 | CTL > OSU    | OSU > CTL   |
| 3968 <sup>1</sup> | 37  | -62 | -4  | R   | Fusiform Gyrus                         | ns           | OSU > CTL   |
| 2816 <sup>1</sup> | -18 | 0   | 11  | L   | Lentiform Nucleus                      | CTL > OSU    | ns          |
| 2176 <sup>1</sup> | -41 | -61 | 24  | L   | Middle Temporal Gyrus                  | CTL > OSU    | OSU > CTL   |
| 2176 <sup>1</sup> | 21  | -58 | 45  | R   | Precuneus                              | ns           | OSU > CTL   |
| 2112 <sup>1</sup> | -28 | 14  | 46  | L   | Middle Frontal Gyrus                   | CTL > OSU    | ns          |
| 1856 <sup>1</sup> | 55  | -12 | 9   | R   | Superior Temporal Gyrus                | ns           | OSU > CTL   |
| 1792 <sup>1</sup> | 21  | 4   | 10  | R   | Lentiform Nucleus                      | ns           | OSU > CTL   |
| 1472 <sup>1</sup> | 9   | -57 | 60  | R   | Precuneus                              | ns           | OSU > CTL   |
| 1344 <sup>1</sup> | 31  | -38 | 55  | R   | Inferior Parietal Lobule               | CTL > OSU    | OSU > CTL   |
| 1088 <sup>1</sup> | 9   | -79 | -5  | R   | Lingual Gyrus                          | CTL > OSU    | OSU > CTL   |
| 1088 <sup>1</sup> | 46  | -56 | 24  | R   | Middle Temporal Gyrus                  | ns           | OSU > CTL   |
| 1024 <sup>1</sup> | 0   | -30 | 4   | L   | Thalamus                               | CTL > OSU    | ns          |
| 1088 <sup>2</sup> | -36 | 19  | 5   | L   | Anterior Insula                        | ns           | OSU > CTL   |
| 896 <sup>1</sup>  | 58  | -39 | 9   | R   | Superior Temporal Gyrus                | ns           | OSU > CTL   |
| 832 <sup>1</sup>  | 6   | 39  | -16 | R   | Medial Frontal Gyrus                   | CTL > OSU    | OSU > CTL   |
| 512 <sup>2</sup>  | 12  | 6   | 13  | R   | Caudate                                | ns           | OSU > CTL   |

OSU, occasional stimulant users; CTL, control subjects; L, left hemisphere; R, right hemisphere; ns, non-significant at  $p < .05$  corrected for multiple comparisons via AlphaSim.

Coordinates reflect center of mass.

<sup>1</sup> Whole brain mask.

<sup>2</sup> Limbic mask.

**Table S2.** fMRI Results for the Cannabis Group (Low MJ-OSU, High MJ-OSU, Low MJ-CTL) by Decision Time (Early Trials, Late Trials) Interaction ( $n = 123$ ).

| Volume<br>( $\mu$ L) | x   | y   | z  | L/R | Area                   | Early Trials                                        | Late Trials                                         |
|----------------------|-----|-----|----|-----|------------------------|-----------------------------------------------------|-----------------------------------------------------|
| 9344 <sup>1</sup>    | -26 | 7   | 8  | L   | Lentiform Nucleus      | Low MJ-CTL > Low MJ-OSU                             | High MJ-OSU > Low MJ-CTL                            |
| 4224 <sup>1</sup>    | 43  | 21  | 13 | R   | Inferior Frontal Gyrus | ns                                                  | High MJ-OSU > Low MJ-CTL                            |
| 2944 <sup>1</sup>    | 22  | 6   | 9  | R   | Lentiform Nucleus      | Low MJ-CTL > Low MJ-OSU                             | Low MJ-OSU > Low MJ-CTL<br>High MJ-OSU > Low MJ-CTL |
| 1344 <sup>1</sup>    | -44 | 19  | 17 | L   | Inferior Frontal Gyrus | High MJ-OSU > Low MJ-OSU<br>Low MJ-CTL > Low MJ-OSU | High MJ-OSU > Low MJ-CTL                            |
| 1088 <sup>1</sup>    | 40  | 36  | 12 | R   | Inferior Frontal Gyrus | ns                                                  | High MJ-OSU > Low MJ-CTL                            |
| 832 <sup>1</sup>     | -40 | 36  | 10 | L   | Inferior Frontal Gyrus | High MJ-OSU > Low MJ-OSU<br>Low MJ-CTL > Low MJ-OSU | High MJ-OSU > Low MJ-CTL                            |
| 832 <sup>2</sup>     | 13  | 11  | 12 | R   | Caudate                | Low MJ-CTL > Low MJ-OSU                             | High MJ-OSU > Low MJ-CTL                            |
| 832 <sup>2</sup>     | -11 | 7   | 12 | L   | Caudate                | Low MJ-CTL > Low MJ-OSU                             | ns                                                  |
| 576 <sup>2</sup>     | -30 | -29 | 17 | L   | Anterior Insula        | ns                                                  | High MJ-OSU > Low MJ-CTL                            |
| 512 <sup>2</sup>     | 44  | -17 | 6  | R   | Posterior Insula       | ns                                                  | Low MJ-OSU > Low MJ-CTL<br>High MJ-OSU > Low MJ-CTL |
| 320 <sup>2</sup>     | 39  | 3   | -1 | R   | Mid Insula             | Low MJ-CTL > High MJ-OSU                            | High MJ-OSU > Low MJ-CTL                            |

L, left hemisphere; R, right hemisphere; ns, non significant at  $p < .05$  corrected for multiple comparisons via AlphaSim.

Low MJ-OSU = occasional stimulant users with  $\leq 50$  lifetime cannabis uses. High MJ-OSU = occasional stimulant users with  $\geq 1000$  lifetime cannabis uses. Low MJ-CTL = control subjects with  $\leq 50$  lifetime cannabis uses. Coordinates reflect center of mass.

<sup>1</sup> Whole brain mask.

<sup>2</sup> Limbic mask.

**Table S3.** fMRI Results for the Predominately Cocaine/Predominately Prescription Group (PCU, PPU, CTL) by Decision Time (Early Trials, Late Trials) Interaction ( $n = 154$ ).

| Volume (μL)        | x   | y  | z  | L/R | Area                   | Early Trials | Late Trials            |
|--------------------|-----|----|----|-----|------------------------|--------------|------------------------|
| 11776 <sup>1</sup> | -24 | 11 | 8  | L   | Lentiform Nucleus      | ns           | PCU > PPU<br>PCU > CTL |
| 2496 <sup>2</sup>  | -12 | 6  | 12 | L   | Caudate                | ns           | PCU > PPU<br>PCU > CTL |
| 1920 <sup>1</sup>  | 44  | 19 | 17 | R   | Inferior Frontal Gyrus | ns           | PCU > CTL<br>PPU > CTL |
| 1536 <sup>1</sup>  | -36 | 10 | 25 | L   | Inferior Frontal Gyrus | ns           | PCU > PPU<br>PCU > CTL |
| 1472 <sup>2</sup>  | -35 | 18 | 5  | L   | Anterior Insula        | ns           | PCU > CTL<br>PPU > CTL |
| 1408 <sup>1</sup>  | 24  | 4  | 9  | R   | Lentiform Nucleus      | ns           | PCU > CTL<br>PPU > CTL |
| 448 <sup>2</sup>   | 14  | 17 | 1  | R   | Caudate                | ns           | PCU > PPU<br>PCU > CTL |
| 320 <sup>2</sup>   | 13  | 9  | 12 | R   | Caudate                | ns           | PCU > CTL              |

CTL, control subjects; PPU, predominately prescription stimulant users; PCU, predominately cocaine users; L, left hemisphere; R, right hemisphere; ns, non significant at  $p < .05$  corrected for multiple comparisons via AlphaSim. Coordinates reflect center of mass.

<sup>1</sup> Whole brain mask.

<sup>2</sup> Limbic mask.

**Table S4.** fMRI Robust Regression Results Within OSU: Lifetime Drug Use ( $n = 161$ ) predicting brain activation for late trials (when contingencies are familiar).

| <b>Drug</b>             | <b>Volume<br/>(<math>\mu\text{L}</math>)</b> | <b>x</b> | <b>y</b> | <b>z</b> | <b>L/R</b> | <b>Area</b> | <b>Correlation</b> |
|-------------------------|----------------------------------------------|----------|----------|----------|------------|-------------|--------------------|
| Prescription Stimulants | 1216                                         | 3        | 19       | 5        | L          | Caudate     | Negative           |
|                         | 1088                                         | -10      | 18       | 0        | R          | Caudate     | Negative           |
|                         | 768                                          | 13       | -6       | 17       | R          | Caudate     | Negative           |
| Cannabis                | 320                                          | 12       | 6        | 14       | R          | Caudate     | Positive           |

OSU, occasional stimulant users; L, left hemisphere; R, right hemisphere.

Results above are corrected for multiple comparisons at  $p < .05$  via AlphaSim using a limbic mask (no results emerged for the whole brain mask). Coordinates reflect center of mass. No effects for lifetime cocaine use emerged for the dorsal striatum. No effects of insula or inferior frontal gyrus emerged for lifetime drug use predictors.

**Table S5.** fMRI Robust Regression Results Within OSU ( $n = 153$ ): Typical current patterns of substance use predicting brain activation for late trials (when contingencies are familiar).

| Drug     | Volume ( $\mu\text{L}$ ) | x  | y   | z  | L/R | Area                                   | Correlation |
|----------|--------------------------|----|-----|----|-----|----------------------------------------|-------------|
| Nicotine | 4288 <sup>1</sup>        | 26 | 25  | 7  | R   | Anterior Insula/Inferior Frontal Gyrus | Negative    |
|          | 448 <sup>2</sup>         | 40 | 17  | 4  | R   | Anterior Insula                        | Negative    |
|          | 384 <sup>2</sup>         | 41 | -5  | -2 | R   | Posterior Insula                       | Negative    |
| Alcohol  | 1856 <sup>1</sup>        | -4 | 15  | 5  | L   | Caudate                                | Negative    |
|          | 768 <sup>1</sup>         | 17 | -20 | 20 | R   | Caudate                                | Negative    |

OSU, occasional stimulant users; L, left hemisphere; R, right hemisphere.

Nicotine = typical number of cigarettes smoked per day. Alcohol = typical number of drinks consumed per week. Data was not collected on weekly alcohol use for eight stimulant users; as a result, these subjects were not included in this analysis ( $n = 153$ ). Results are corrected for multiple comparisons at  $p < .05$  via AlphaSim. Coordinates reflect center of mass.

<sup>1</sup> Whole brain mask.

<sup>2</sup> Limbic mask.

**Table S6.** fMRI Results for t-tests between Group (OSU, CTL) for Early Trials and Late Trials separately.

| Trial Type | Volume (μL)       | x   | y   | z   | L/R | Area                    | Effect    |
|------------|-------------------|-----|-----|-----|-----|-------------------------|-----------|
| Early      | 3648 <sup>1</sup> | -6  | 29  | -17 | L   | Medial Frontal Gyrus    | CTL > OSU |
|            | 1408 <sup>1</sup> | -36 | 55  | 0   | L   | Middle Frontal Gyrus    | OSU > CTL |
|            | 1408 <sup>1</sup> | 2   | 59  | 18  | R   | Medial Frontal Gyrus    | CTL > OSU |
|            | 1280 <sup>1</sup> | -40 | -24 | -15 | L   | Parahippocampal Gyrus   | CTL > OSU |
|            | 1024 <sup>1</sup> | -19 | 5   | -32 | L   | Uncus                   | CTL > OSU |
|            | 896 <sup>1</sup>  | -37 | -24 | 62  | L   | Precentral Gyrus        | CTL > OSU |
|            | 832 <sup>1</sup>  | 42  | -39 | 3   | R   | Superior Temporal Gyrus | OSU > CTL |
|            | 256 <sup>2</sup>  | -4  | 14  | 1   | L   | Caudate                 | CTL > OSU |
| Late       | 3648 <sup>1</sup> | 51  | -39 | 7   | R   | Superior Temporal Gyrus | OSU > CTL |
|            | 2368 <sup>1</sup> | 45  | -59 | 30  | R   | Angular Gyrus           | OSU > CTL |
|            | 1984 <sup>1</sup> | -43 | 18  | 8   | L   | Precentral Gyrus        | OSU > CTL |
|            | 1856 <sup>1</sup> | 23  | -68 | 42  | R   | Precuneus               | OSU > CTL |
|            | 1024 <sup>1</sup> | -52 | -43 | 30  | L   | Supramarginal Gyrus     | OSU > CTL |
|            | 960 <sup>1</sup>  | -35 | 56  | 2   | L   | Middle Frontal Gyrus    | OSU > CTL |
|            | 832 <sup>2</sup>  | -39 | 18  | 5   | L   | Anterior Insula         | OSU > CTL |
|            | 768 <sup>1</sup>  | -18 | 4   | -32 | L   | Uncus                   | CTL > OSU |
|            | 768 <sup>1</sup>  | 18  | -22 | -15 | R   | Parahippocampal Gyrus   | CTL > OSU |
|            | 448 <sup>2</sup>  | 40  | -3  | 12  | R   | Posterior Insula        | OSU > CTL |
|            | 384 <sup>2</sup>  | 33  | 17  | 11  | R   | Anterior Insula         | OSU > CTL |

OSU, occasional stimulant users; L, left hemisphere; R, right hemisphere.

Results above are corrected for multiple comparisons at  $p < .05$  via AlphaSim. Coordinates reflect center of mass.

<sup>1</sup> Whole brain mask.

<sup>2</sup> Limbic mask.

**Table S7.** fMRI Results for the Group (OSU, CTL) by Decision (Preferred, Even, Worst) Interaction ( $n = 209$ ).

| Volume (uL)        | x   | y   | z   | L/R | Area                                   | Preferred | Even      | Worst     |
|--------------------|-----|-----|-----|-----|----------------------------------------|-----------|-----------|-----------|
| 14976 <sup>1</sup> | -15 | -57 | 24  | L   | Precuneus                              | CTL > OSU | ns        | ns        |
| 3776 <sup>1</sup>  | 2   | -82 | -3  | R   | Lingual Gyrus                          | CTL > OSU | ns        | ns        |
| 2816 <sup>1</sup>  | -12 | -43 | 42  | L   | Cingulate Gyrus                        | CTL > OSU | ns        | ns        |
| 2240 <sup>1</sup>  | 0   | 48  | 14  | L   | Medial Frontal Gyrus                   | CTL > OSU | ns        | ns        |
| 2176 <sup>1</sup>  | 32  | -45 | 50  | R   | Precuneus                              | CTL > OSU | CTL > OSU | ns        |
| 1536 <sup>1</sup>  | 0   | -42 | -7  | L   | Cerebellar Lingual                     | CTL > OSU | ns        | ns        |
| 1536 <sup>1</sup>  | -39 | -70 | -7  | L   | Middle Occipital Gyrus                 | ns        | ns        | OSU > CTL |
| 1472 <sup>1</sup>  | -4  | -19 | 17  | L   | Thalamus                               | ns        | ns        | OSU > CTL |
| 1344 <sup>1</sup>  | -39 | -4  | -17 | L   | Superior Temporal Gyrus                | CTL > OSU | ns        | ns        |
| 1344 <sup>1</sup>  | 16  | 60  | 12  | R   | Superior Frontal Gyrus                 | CTL > OSU | ns        | ns        |
| 1088 <sup>1</sup>  | 44  | -28 | -13 | R   | Fusiform Gyrus                         | ns        | ns        | OSU > CTL |
| 1088 <sup>2</sup>  | -1  | 42  | 13  | L   | Anterior Cingulate                     | CTL > OSU | ns        | ns        |
| 1024 <sup>1</sup>  | 55  | -6  | -17 | R   | Middle Temporal Gyrus                  | CTL > OSU | OSU > CTL | ns        |
| 960 <sup>1</sup>   | -3  | 5   | 52  | L   | Superior Frontal Gyrus                 | CTL > OSU | ns        | ns        |
| 896 <sup>1</sup>   | 38  | 32  | -7  | R   | Inferior Frontal Gyrus                 | CTL > OSU | ns        | ns        |
| 896 <sup>1</sup>   | -15 | 59  | -3  | L   | Medial Frontal Gyrus                   | CTL > OSU | ns        | ns        |
| 832 <sup>1</sup>   | -28 | -65 | -28 | L   | Pyramis                                | CTL > OSU | CTL > OSU | ns        |
| 832 <sup>1</sup>   | -41 | 21  | 10  | L   | Anterior Insula/Inferior Frontal Gyrus | CTL > OSU | ns        | ns        |
| 832 <sup>1</sup>   | 25  | 49  | 33  | R   | Superior Frontal Gyrus                 | CTL > OSU | ns        | ns        |
| 768 <sup>1</sup>   | 20  | -45 | 19  | R   | Posterior Cingulate                    | ns        | ns        | OSU > CTL |
| 512 <sup>2</sup>   | -9  | 5   | 17  | L   | Caudate                                | CTL > OSU | ns        | ns        |
| 448 <sup>2</sup>   | 45  | -3  | -2  | R   | Posterior Insula                       | ns        | ns        | CTL > OSU |
| 384 <sup>2</sup>   | -36 | 21  | 11  | L   | Anterior Insula                        | CTL > OSU | ns        | ns        |

OSU, occasional stimulant users; CTL, control subjects; L, left hemisphere; R, right hemisphere; ns, non significant at  $p < .05$  corrected for multiple comparisons via AlphaSim.

Coordinates reflect center of mass.

<sup>1</sup> Whole brain mask.

<sup>2</sup> Limbic mask.

**Table S8.** fMRI Results for the Group by Outcome (Wins, Ties, Losses) Interaction ( $n = 209$ ).

| Volume<br>( $\mu$ L) | x   | y   | z   | L/R | Area                     | Wins      | Ties      | Losses    |
|----------------------|-----|-----|-----|-----|--------------------------|-----------|-----------|-----------|
| 7168 <sup>1</sup>    | -9  | -90 | -4  | L   | Lingual Gyrus            | ns        | ns        | ns        |
| 1408 <sup>1</sup>    | -36 | -38 | 7   | L   | Superior Temporal Gyrus  | ns        | ns        | ns        |
| 1216 <sup>1</sup>    | 12  | -93 | 7   | R   | Cuneus                   | CTL > OSU | CTL > OSU | ns        |
| 1088 <sup>1</sup>    | 3   | 0   | 55  | R   | Medial Frontal Gyrus     | OSU > CTL | ns        | ns        |
| 960 <sup>1</sup>     | -3  | -13 | -15 | L   | Mammillary Body          | CTL > OSU | CTL > OSU | ns        |
| 768 <sup>1</sup>     | -2  | 45  | 43  | L   | Superior Frontal Gyrus   | ns        | ns        | OSU > CTL |
| 768 <sup>1</sup>     | 37  | -50 | 54  | R   | Inferior Parietal Lobule | ns        | ns        | ns        |
| 256 <sup>2</sup>     | 9   | 21  | 3   | R   | Caudate                  | ns        | ns        | ns        |

OSU, occasional stimulant users; CTL, control subjects; L, left hemisphere; R, right hemisphere; ns, non significant at  $p < .05$  corrected for multiple comparisons via AlphaSim.

Coordinates reflect center of mass.

<sup>1</sup> Whole brain mask.

<sup>2</sup> Limbic mask.



## Supplemental References

1. Miller GA, Chapman JP (2001): Misunderstanding analysis of covariance. *J Abnorm Psychol.* 110:40-8.
2. Huber PJ (1964): Robust estimation of location parameter. *Ann Math Stat.* 35:73-101.
3. Rousseeuw P, Croux C, Todorov V, Ruckstuhl A, Salibian-Barrera M, Verbeke T, *et al.* (2011): robustbase: Basic Robust Statistics. R package version 0.9-3. URL: <http://CRAN.R-project.org/package=robustbase>.
4. Vaidya JG, Block RI, O'Leary DS, Ponto LB, Ghoneim MM, Bechara A (2012): Effects of chronic marijuana use on brain activity during monetary decision-making. *Neuropsychopharmacology.* 37:618-29.
5. d'Acromont M, Lu ZL, Li X, Van der Linden M, Bechara A (2009): Neural correlates of risk prediction error during reinforcement learning in humans. *Neuroimage.* 47:1929-39.
6. Naqvi NH, Bechara A (2010): The insula and drug addiction: an interoceptive view of pleasure, urges, and decision-making. *Brain Struct Funct.* 214:435-50.
7. Courtney SM, Ungerleider LG, Keil K, Haxby JV (1997): Transient and sustained activity in a distributed neural system for human working memory. *Nature.* 386:608-11.
8. McCarthy G, Puce A, Constable RT, Krystal JH, Gore JC, Goldman-Rakic P (1996): Activation of human prefrontal cortex during spatial and nonspatial working memory tasks measured by functional MRI. *Cereb Cortex.* 6:600-11.
9. Knutson B, Cooper JC (2005): Functional magnetic resonance imaging of reward prediction. *Curr Opin Neurol.* 18:411-7.
10. Preuschoff K, Quartz SR, Bossaerts P (2008): Human insula activation reflects risk prediction errors as well as risk. *J Neurosci.* 28:2745-52.
11. Li J, McClure SM, King-Casas B, Montague PR (2006): Policy adjustment in a dynamic economic game. *PLoS One.* 1:e103.

12. Ghahremani DG, Tabibnia G, Monterosso J, Helleman G, Poldrack RA, London ED (2011): Effect of modafinil on learning and task-related brain activity in methamphetamine-dependent and healthy individuals. *Neuropsychopharmacology*. 36:950-9.
